# Supplementary material
Source: PubMed Central journal article supplement (PMC8018298)

Supplemental Figures for:

"FOLFOXIRI-bevacizumab or FOLFOX-panitumumab in left-sided RAS/BRAF wild-type metastatic colorectal cancer patients: a propensity score-based analysis" Chiara Cremolini et al.

#### **SUPPLEMENTAL FIGURE LEGENDS**

**Supplemental Figure S1. Flow chart showing the process of patients' selection.**

**Supplemental Figure S2. Bar graph showing the distribution of propensity scores in the treatment groups before (Panel A) and after (Panel B) the matching process.**

**Supplemental Figure S3. Kaplan-Meier curves for PFS (panel A) and OS (panel B) according to treatment in the propensity score matched sensitivity analysis.** Blue lines indicate patients treated with FOLFOX-panitumumab whereas violet lines indicate patients treated with FOLFOXIRI-bevacizumab.

**Supplemental Figure S4. Kaplan-Meier curves for PFS (panel A) and OS (panel B) from time of secondary resection according to treatment in the subgroup of patients who underwent secondary resection with curative intent.** Blue lines indicate patients treated with FOLFOX-panitumumab whereas violet lines indicate patients treated with FOLFOXIRI-bevacizumab.

Supplemental Figure S1

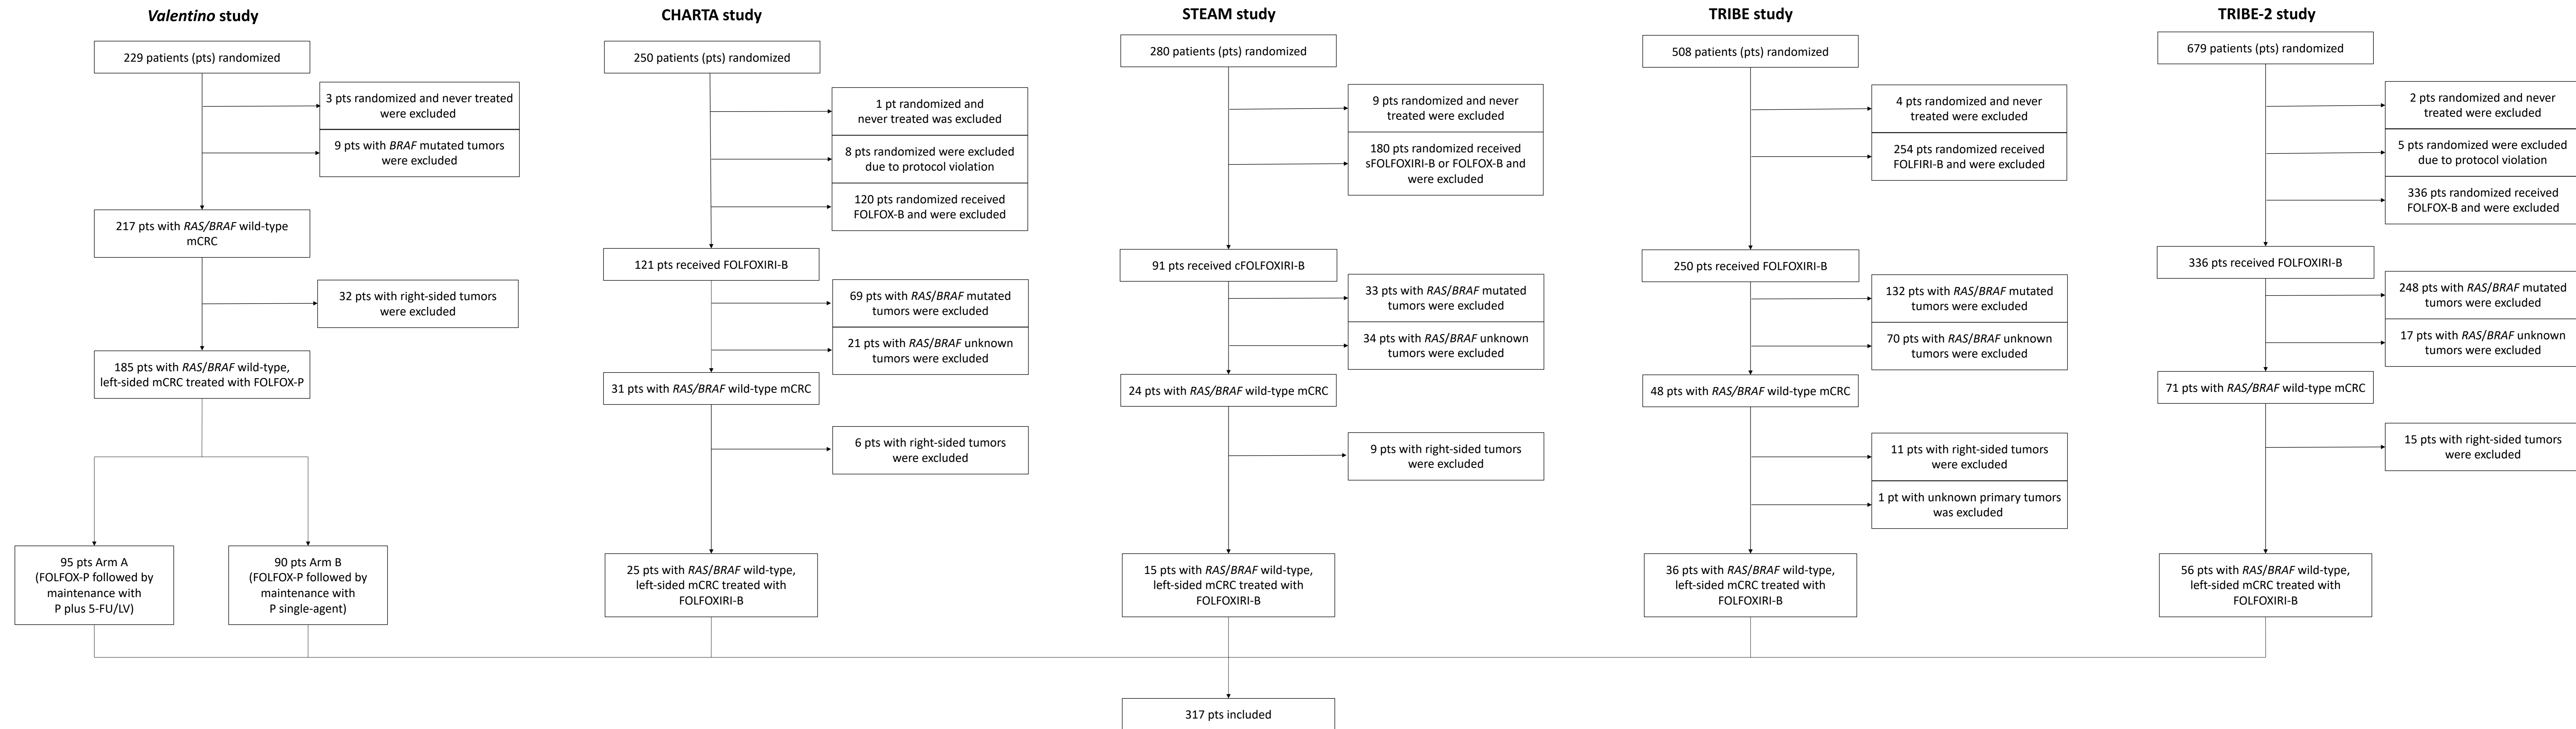

# Supplemental Figure S2

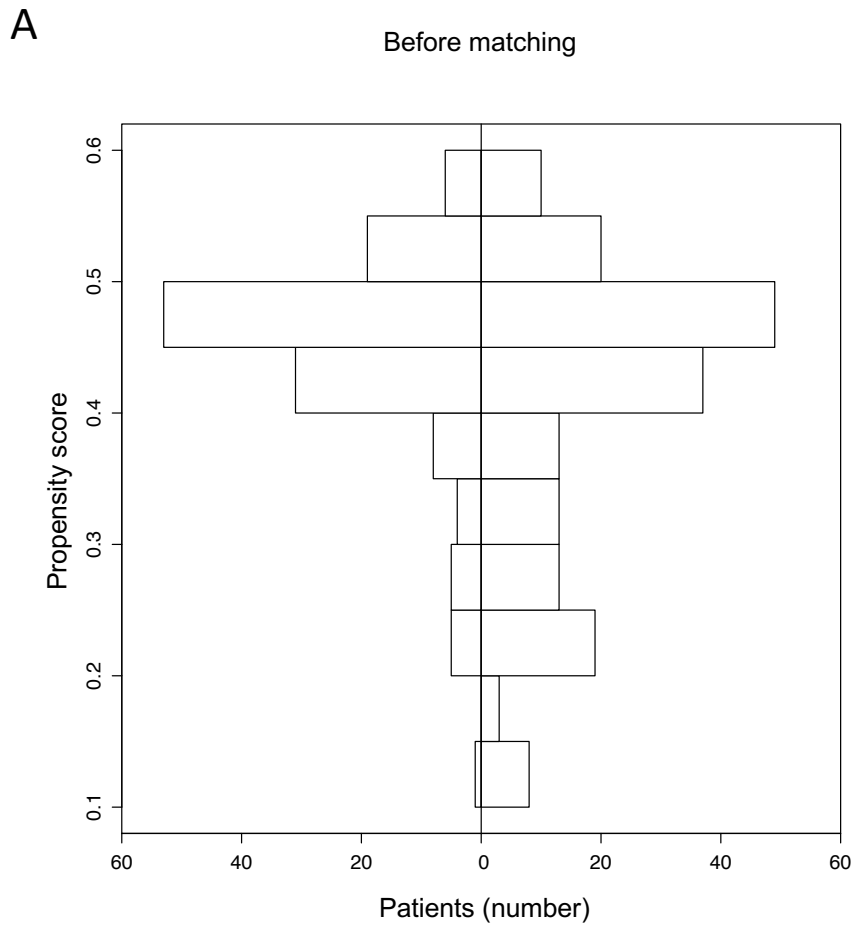

FOLFOXIRI-bevacizumab  
N = 132

FOLFOX-panitumumab  
N = 185

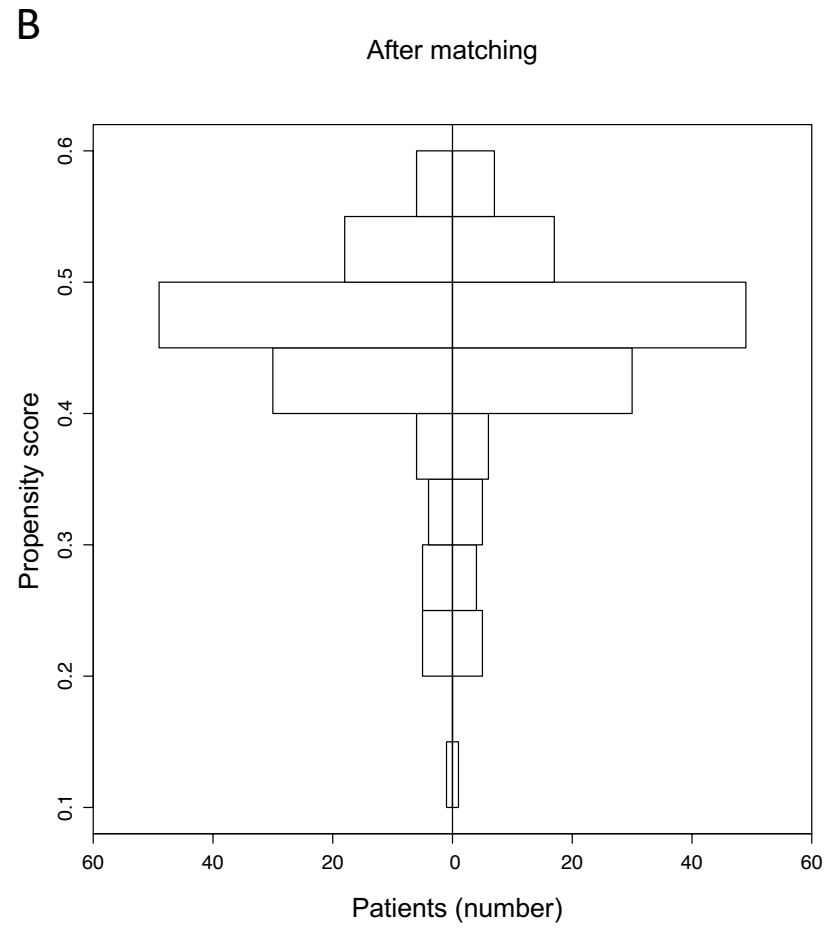

FOLFOXIRI-bevacizumab  
N = 124

FOLFOX-panitumumab  
N = 124

A

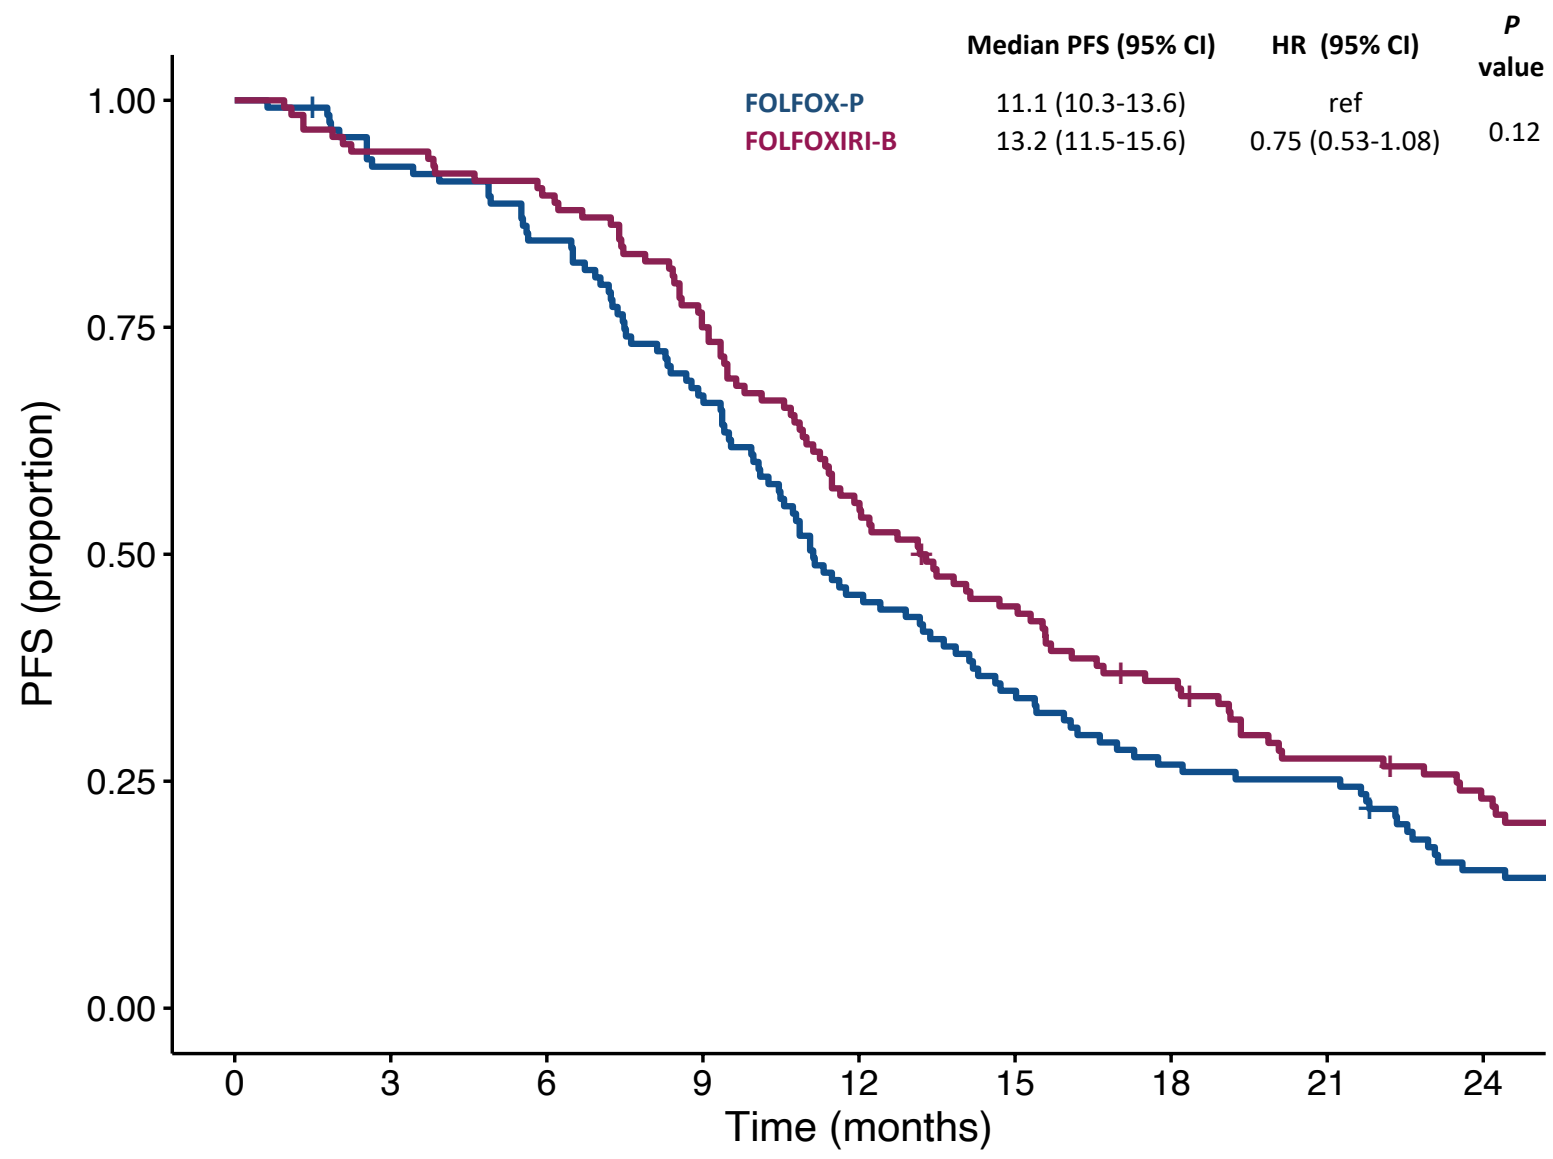

Number at risk

|               |     |     |    |    |    |    |    |    |
|---------------|-----|-----|----|----|----|----|----|----|
| 124           | 114 | 104 | 83 | 56 | 43 | 33 | 31 | 18 |
| 124           | 117 | 111 | 93 | 69 | 54 | 43 | 32 | 26 |
| 0             | 3   | 6   | 9  | 12 | 15 | 18 | 21 | 24 |
| Time (months) |     |     |    |    |    |    |    |    |

B

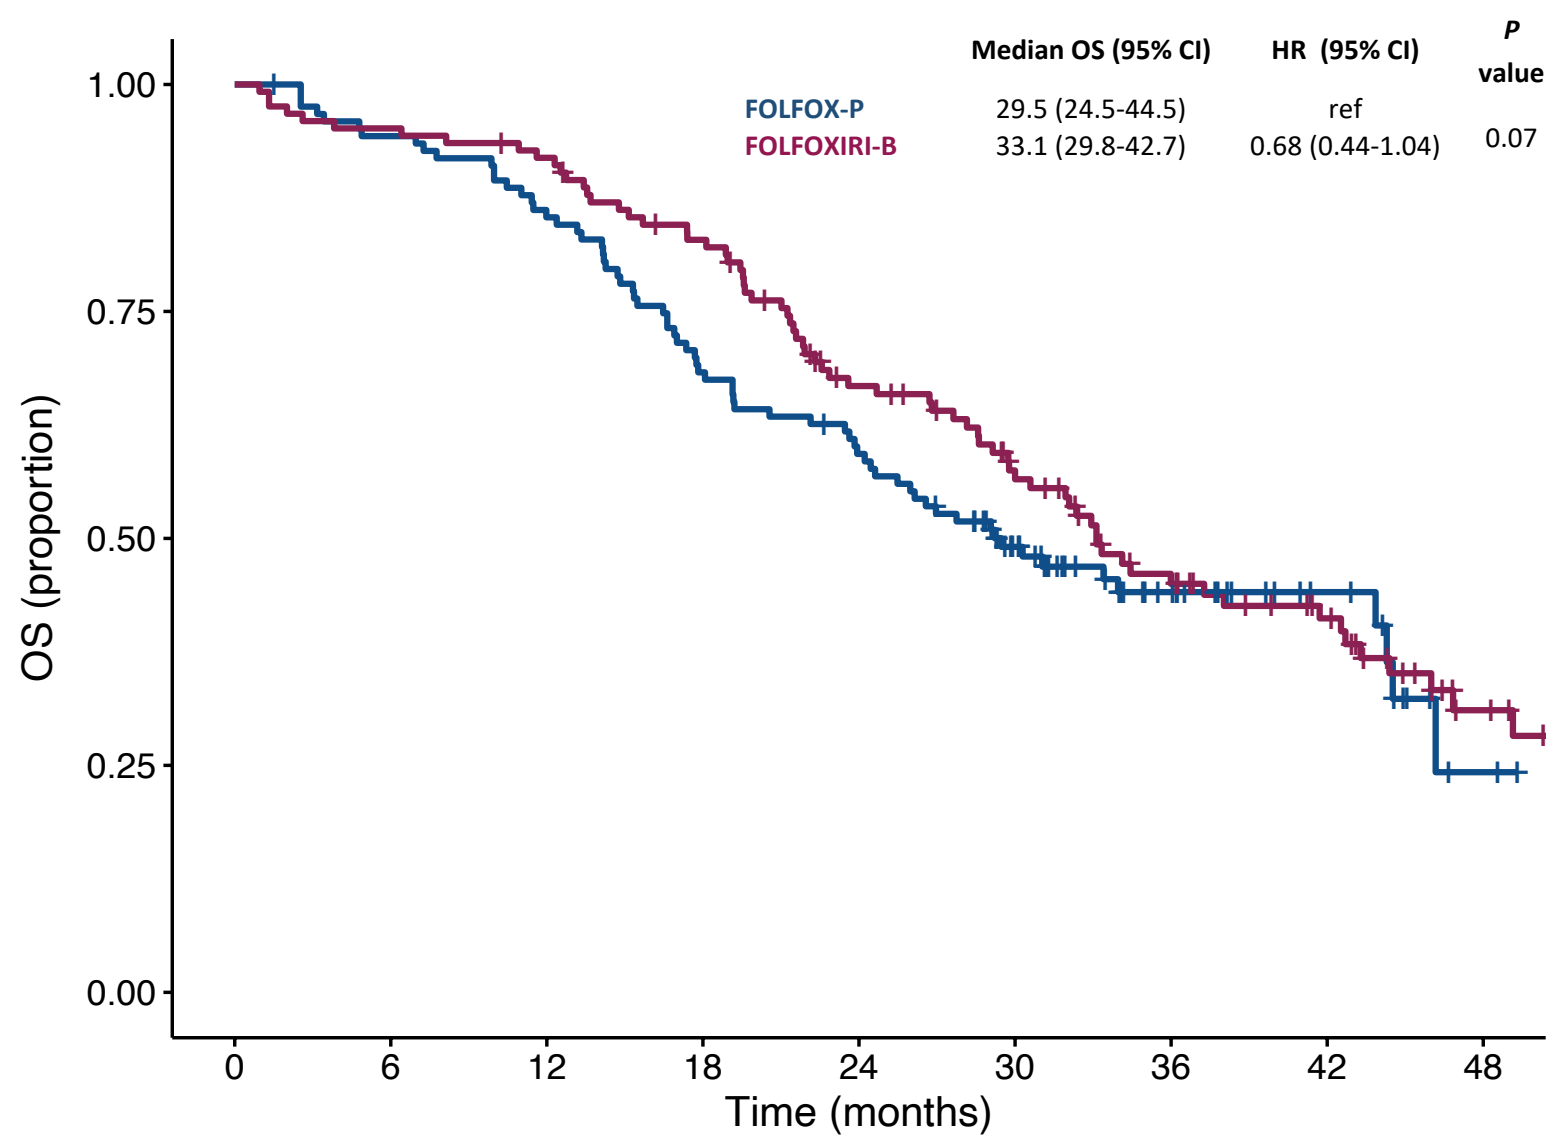

Number at risk

|               |     |     |     |    |    |    |    |    |
|---------------|-----|-----|-----|----|----|----|----|----|
| 124           | 116 | 105 | 84  | 72 | 48 | 25 | 13 | 2  |
| 124           | 118 | 113 | 100 | 75 | 59 | 41 | 30 | 13 |
| 0             | 6   | 12  | 18  | 24 | 30 | 36 | 42 | 48 |
| Time (months) |     |     |     |    |    |    |    |    |

A

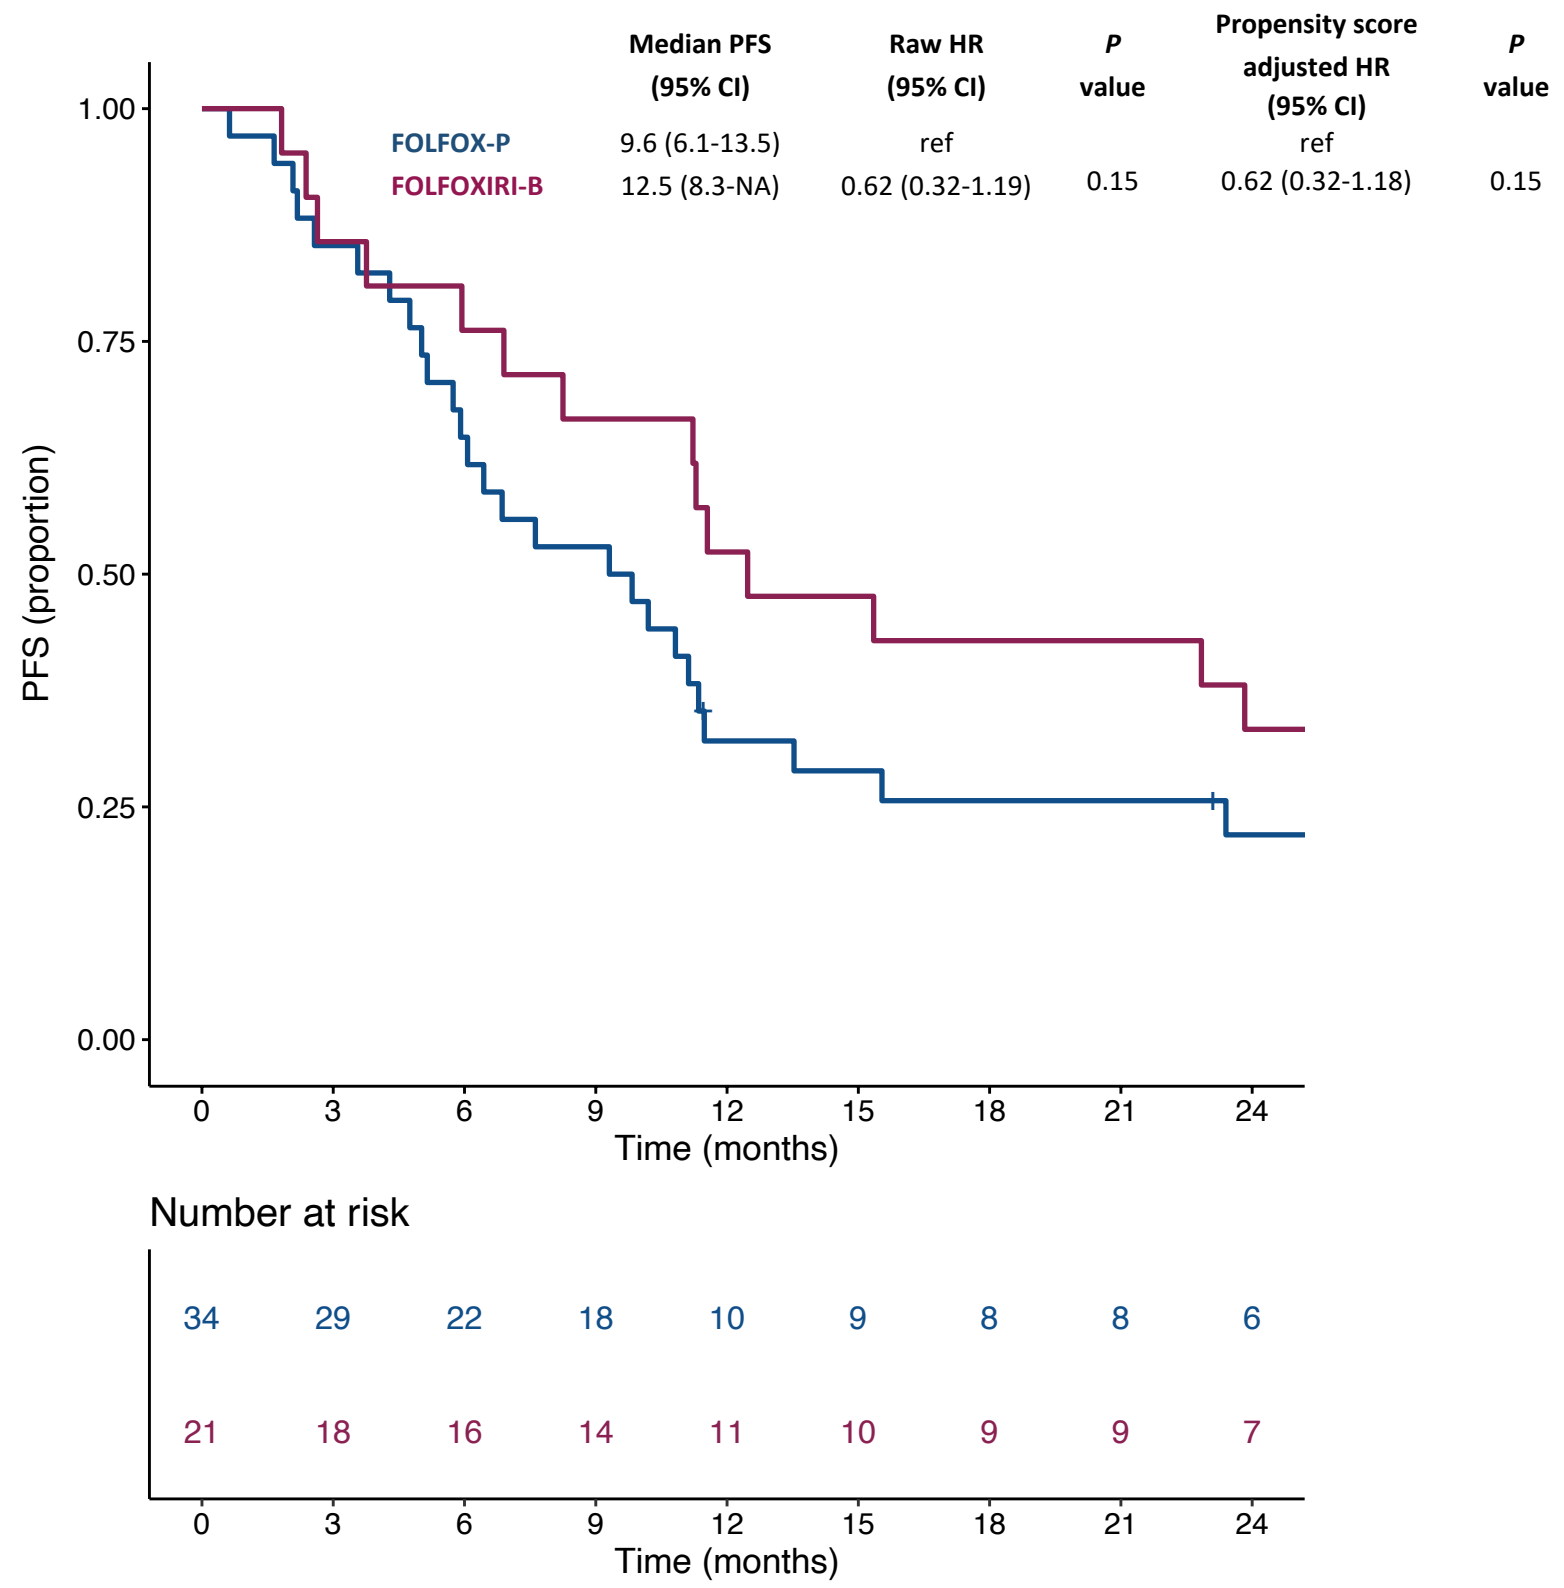

B

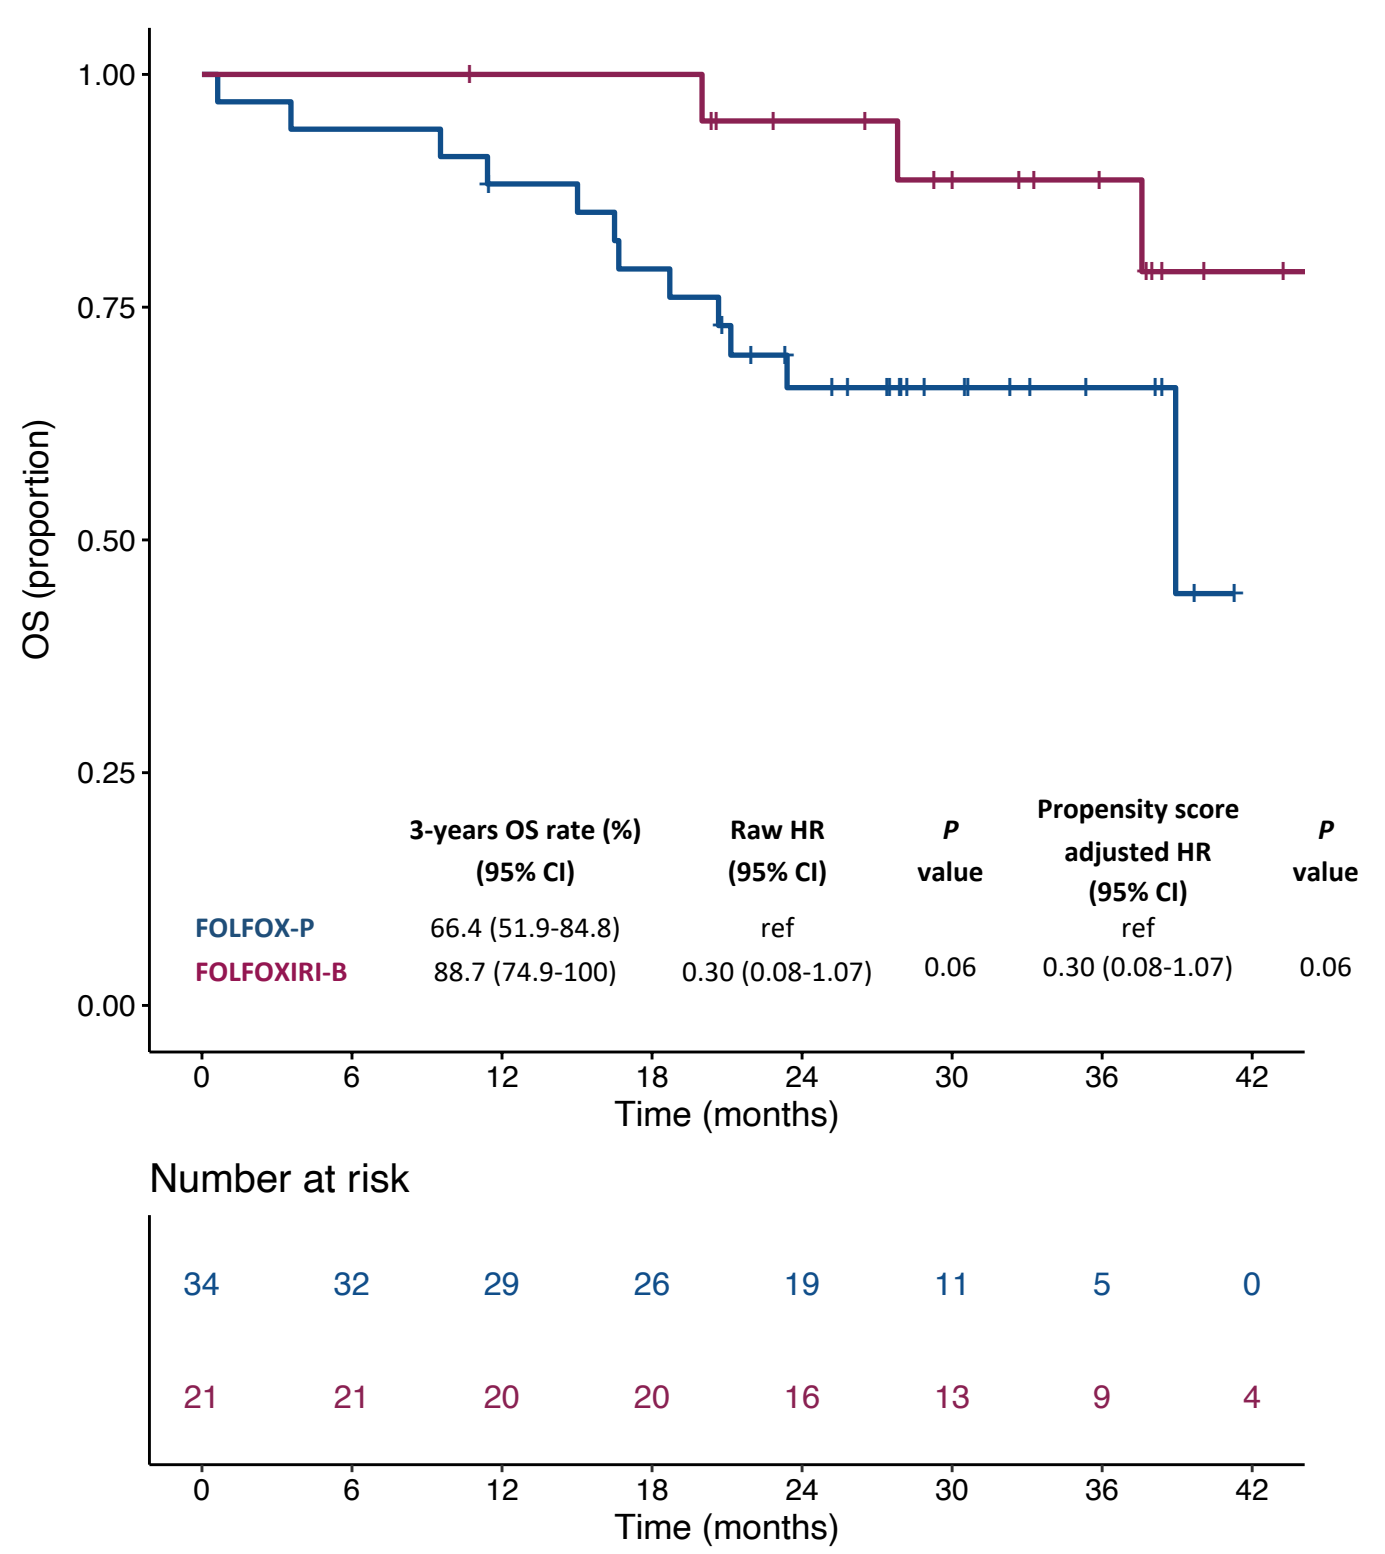

Supplement: ONCO-26-302-s002.pdf [file ONCO-26-302-s002.pdf]
