# Supplementary material
Source: PubMed Central journal article supplement (PMC8018298)
Supplement: ONCO-26-302-s001.pdf [file ONCO-26-302-s001.pdf]

Supplemental Tables for "FOLFOXIRI-bevacizumab or FOLFOX-panitumumab in left-sided RAS/BRAF wild-type metastatic colorectal cancer patients: a propensity score-based analysis," by Chiara Cremolini et al.

**Supplemental Table S1. Propensity score matched sensitivity analysis for activity according to treatment.**

| Treatment                     | Response (CR+PR) |                  |          | Clinical benefit (CR+PR+SD) |                  |          |
|-------------------------------|------------------|------------------|----------|-----------------------------|------------------|----------|
|                               | N (%)            | OR (95% CI)*     | P value* | N (%)                       | OR (95% CI)*     | P value* |
| <b>FOLFOX-P</b><br>(N=118)    | 96 (81)          | ref              | 0.11     | 112 (95)                    | ref              | 0.67     |
| <b>FOLFOXIRI-B</b><br>(N=118) | 87 (74)          | 0.92 (0.84-1.02) |          | 113 (96)                    | 1.01 (0.97-1.05) |          |

\*Conditional logistic regression Wald test  
*Abbreviations.* CR: complete response; PR: partial response; SD: disease stabilization; OR: odds ratio; CI: confidence interval; B: bevacizumab; P: panitumumab.

**Supplemental Table S2. Propensity score adjusted analysis of secondary resections with curative intent according to treatment.**

|                                                                                                               | <b>Total<br/>(N=317)<br/>N (%)</b> | <b>FOLFOX-P<br/>(N=185)<br/>N (%)</b> | <b>FOLFOXIRI-B<br/>(N=132)<br/>N (%)</b> | <b>Raw P<br/>value*</b> | <b>PS-<br/>adjusted<br/>P Value*</b> |
|---------------------------------------------------------------------------------------------------------------|------------------------------------|---------------------------------------|------------------------------------------|-------------------------|--------------------------------------|
| <b>Secondary<br/>resection</b>                                                                                | 63 (20)                            | 34 (18)                               | 29 (22)                                  | 0.43                    | 0.51                                 |
| *Logistic regression Wald test<br><i>Abbreviations.</i> P: panitumumab; B: bevacizumab; PS: propensity score. |                                    |                                       |                                          |                         |                                      |

**Supplemental Table S3. Propensity score matched sensitivity analysis of secondary resections with curative intent according to treatment.**

|                                                                                                     | <b>Total<br/>(N=248)</b> | <b>FOLFOX-P<br/>(N=124)</b> | <b>FOLFOXIRI-B<br/>(N=124)</b> | <b>P value*</b> |
|-----------------------------------------------------------------------------------------------------|--------------------------|-----------------------------|--------------------------------|-----------------|
|                                                                                                     | <b>N (%)</b>             | <b>N (%)</b>                | <b>N (%)</b>                   |                 |
| <b>Secondary resection</b>                                                                          | 54 (22)                  | 26 (21)                     | 28 (23)                        | 0.79            |
| *Conditional logistic regression Wald test<br><i>Abbreviations.</i> P: panitumumab; B: bevacizumab. |                          |                             |                                |                 |

**Supplemental Table S4. Propensity score matched sensitivity analysis of the incidence of chemotherapy-related adverse events of grade 3 or 4 according to treatment.**

| <b>Grade 3/4<br/>Adverse events</b>                   | <b>FOLFOX-P (N=124)<br/>N (%)</b> | <b>FOLFOXIRI-B<br/>(N=124)<br/>N (%)</b> | <b>P value*</b> |
|-------------------------------------------------------|-----------------------------------|------------------------------------------|-----------------|
| <b>All</b>                                            | 63 (51)                           | 73 (59)                                  | 0.39            |
| <b>Neutropenia</b>                                    | 37 (30)                           | 59 (48)                                  | 0.03            |
| <b>Febrile<br/>Neutropenia</b>                        | 4 (3)                             | 8 (6)                                    | 0.26            |
| <b>Anemia</b>                                         | 4 (3)                             | 5 (4)                                    | 0.74            |
| <b>Thrombocytopenia</b>                               | 5 (4)                             | 3 (2)                                    | 0.48            |
| <b>Nausea</b>                                         | 4 (3)                             | 6 (5)                                    | 0.53            |
| <b>Vomiting</b>                                       | 2 (2)                             | 5 (4)                                    | 0.27            |
| <b>Stomatitis/Oral<br/>mucositis</b>                  | 11 (9)                            | 8 (6)                                    | 0.49            |
| <b>Diarrhea</b>                                       | 16 (13)                           | 15 (12)                                  | 0.86            |
| <b>Peripheral<br/>Neuropathy</b>                      | 6 (5)                             | 4 (3)                                    | 0.53            |
| *Conditional logistic regression Wald test            |                                   |                                          |                 |
| <i>Abbreviations.</i> P: panitumumab; B: bevacizumab. |                                   |                                          |                 |
